# Supplementary material for: Improved photoelectrocatalytic effect of Co(ii) and Fe(iii) mixed porphyrins on graphite paste electrodes towards hydrogen evolution reaction
Source: Royal Society of Chemistry journal article supplement (doi:10.1039/c9nj02430a), 2019-01-01
Supplement: c9nj02430a1.pdf [file c9nj02430a1.pdf]

## SUPPLEMENTARY MATERIAL

### Improved photoelectrocatalytic effect of Co(II) and Fe(III) mixed porphyrins on graphite paste electrodes towards Hydrogen Evolution Reaction

Leyla Gidi, Jessica Honores, José Ibarra, Roxana Arce, M.J. Aguirre, Galo Ramírez

New Journal of Chemistry

**Table S1.** Parameters obtained for the electrodic systems towards HER.  $R_s$  is solution resistance,  $R_{ct}$  is charge transfer resistance,  $L$  is inductance, and CPE is the constant phase element.

| System                | $R_s$ | $R_{ct}$ | $L$ | CPE-T             | CPE-P |
|-----------------------|-------|----------|-----|-------------------|-------|
| Gr                    | 305   | 3950     | 1   | $2 \cdot 10^{-3}$ | 0.60  |
| Gr / Co               | 340   | 1010     | 1   | $1 \cdot 10^{-3}$ | 0.70  |
| Gr / Co irradiated    | 355   | 745      | 1   | $1 \cdot 10^{-3}$ | 0.65  |
| Gr / Fe               | 340   | 1950     | 1   | $1 \cdot 10^{-4}$ | 0.65  |
| Gr / Fe irradiated    | 370   | 1050     | 1   | $2 \cdot 10^{-3}$ | 0.70  |
| Gr / Co-Fe            | 390   | 850      | 1   | $2 \cdot 10^{-3}$ | 0.70  |
| Gr / Co-Fe irradiated | 350   | 510      | 1   | $2 \cdot 10^{-3}$ | 0.60  |

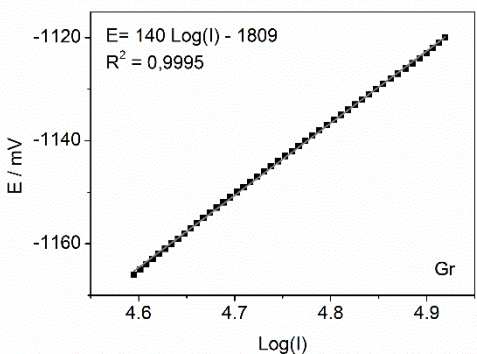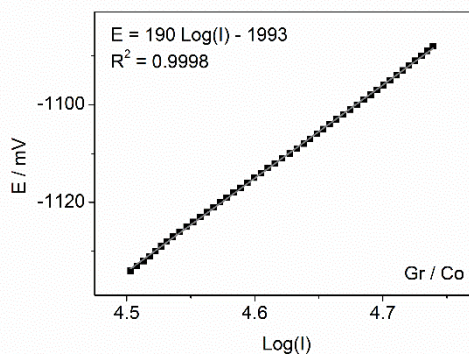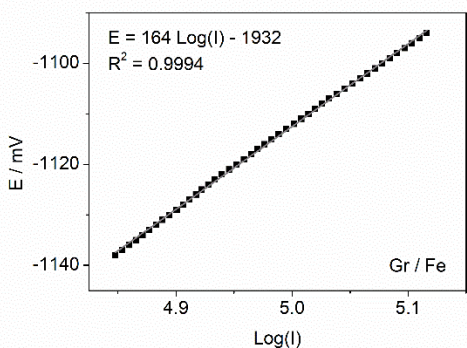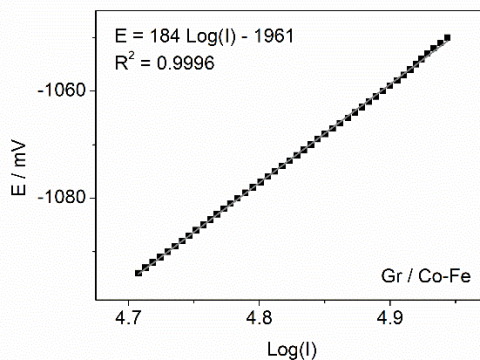

**Figure S1.** Tafel sloped for the studied systems, measured in phosphate buffer pH = 7, a  $\nu = 5 \text{ mV}\cdot\text{s}^{-1}$ .

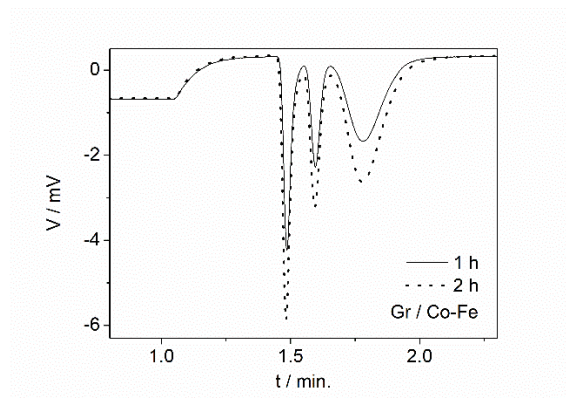

**Figure S2.** Signals obtained by gaseous chromatography for the injections every 1 hour for the electrolysis using the system Gr / Co-Fe. From left to right, the first signal is hydrogen, the second is nitrogen, and the third is oxygen.

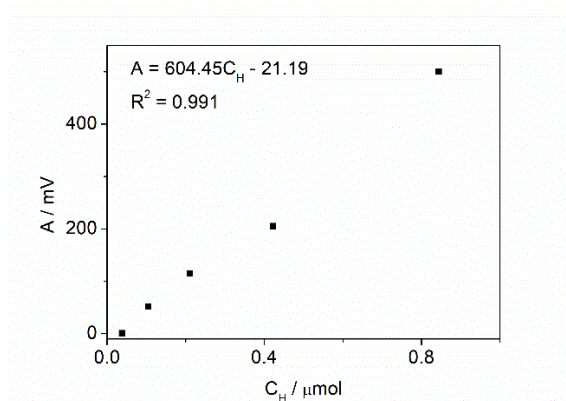

**Figure S3.** Linear correlation between area (mV) and hydrogen concentration ( $\mu\text{mol}$ ) obtained by gaseous chromatography using extra-pure hydrogen (99.999%).

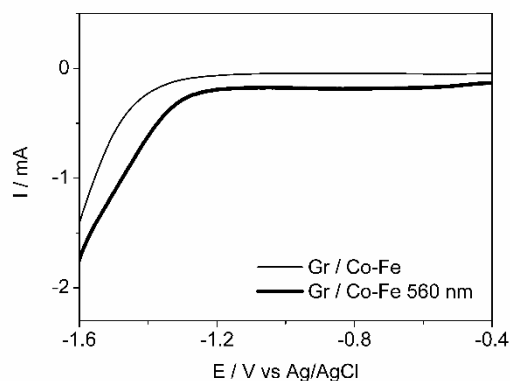

**Figure S4.** Voltammetric profile of the system Gr / Co-Fe used in the chromatographic determination, in absence and in presence of light (560nm). Phosphate buffer at pH = 7 in

Argon saturation  $\nu = 0.1 \text{ V}\cdot\text{s}^{-1}$ .
